# Supplementary material
Source: PubMed Central journal article supplement (PMC4571220)
Supplement: 13197_2012_823_MOESM1_ESM.pdf [file 13197_2012_823_MOESM1_ESM.pdf]

\* \* \* \* IISR, CALICUT - CROP PRODUCTION \* \* \* \*

Sample Information

Acquired by : Admin  
 Sample Name : gingerol std  
 Sample ID : gingerol std  
 Injection Volume : 20 uL  
 Data Filename : gingerol std.lcd  
 Method Filename : Gingerols.lcm  
 Report Filename : Default.lcr  
 Date Acquired : 8/30/2008 12:37:37 PM  
 Data Processed : 8/30/2008 1:21:58 PM

Chromatogram

gingerol std C:\LabSolutions\Data\Project\gingerol std.lcd

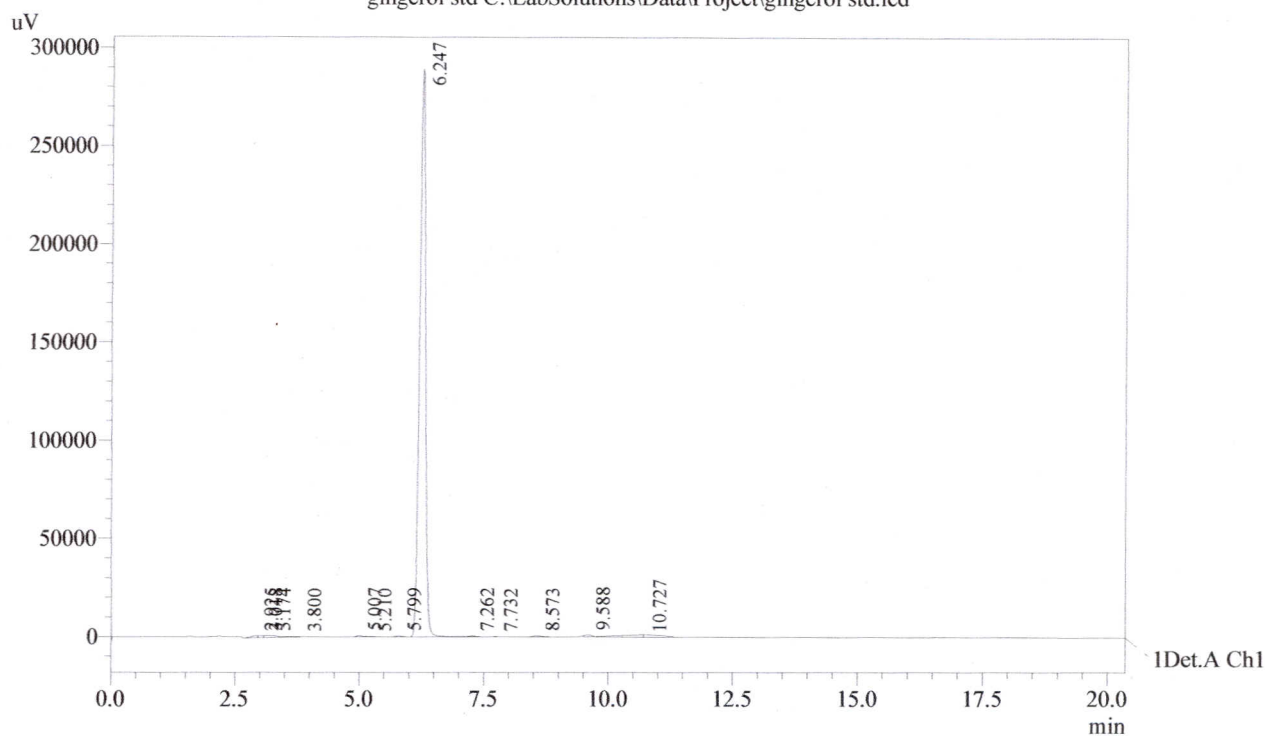

1 Det.A Ch1 / 280nm

PeakTable

Detector A Ch1 280nm

| Peak# | Ret. Time | Area    | Height | Area %  | Height % |
|-------|-----------|---------|--------|---------|----------|
| 1     | 2.925     | 9601    | 971    | 0.405   | 0.330    |
| 2     | 3.018     | 6502    | 957    | 0.275   | 0.325    |
| 3     | 3.174     | 20007   | 906    | 0.845   | 0.308    |
| 4     | 3.800     | 1345    | 126    | 0.057   | 0.043    |
| 5     | 5.007     | 3362    | 491    | 0.142   | 0.167    |
| 6     | 5.210     | 1018    | 125    | 0.043   | 0.043    |
| 7     | 5.799     | 3059    | 389    | 0.129   | 0.132    |
| 8     | 6.247     | 2381186 | 289399 | 100.551 | 98.427   |
| 9     | 7.262     | 4568    | 455    | 0.193   | 0.155    |
| 10    | 7.732     | 1278    | 121    | 0.054   | 0.041    |
| 11    | 8.573     | 8910    | 593    | 0.376   | 0.202    |
| 12    | 9.588     | -37413  | 924    | -1.580  | 0.314    |
| 13    | 10.727    | -35276  | -1434  | -1.490  | -0.488   |
| Total |           | 2368148 | 294024 | 100.000 | 100.000  |

\*\*\* IISR, CALICUT - CROP PRODUCTION \*\*\*

Sample Information

Acquired by : Admin
Sample Name : peeled,sundry 2
Sample ID : peeled,sundry 2
Injection Volume : 20 uL
Data Filename : peeled,sundry 2lcd.lcd
Method Filename : Gingerols.lcm
Report Filename : Default.lcr
Date Acquired : 9/17/2008 2:21:24 PM
Data Processed : 9/18/2008 6:12:29 PM

Chromatogram
peeled,sundry 2 C:\LabSolutions\Data\Project\peeled,sundry 2lcd.lcd

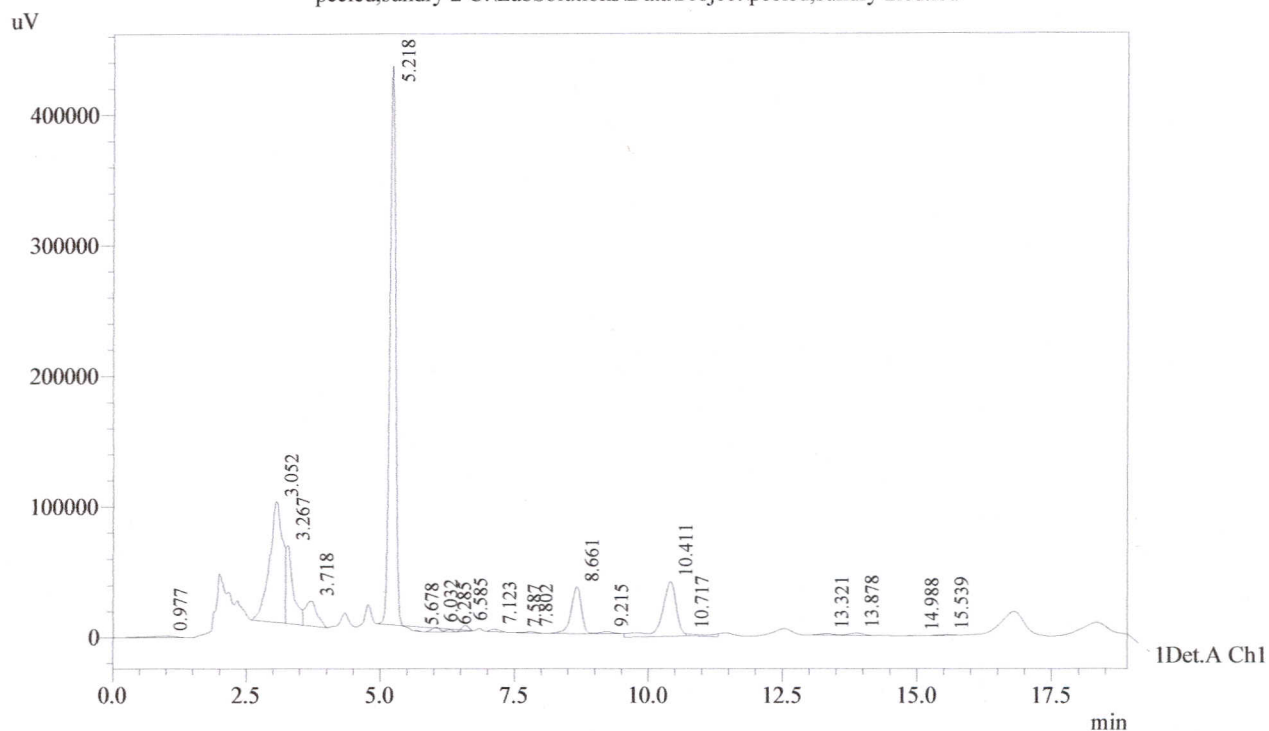

1 Det.A Ch1 / 280nm

PeakTable

Detector A Ch1 280nm

Table with 6 columns: Peak#, Ret. Time, Area, Height, Area %, Height %. It lists 20 individual peaks and a total row.

\*\*\* IISR, CALICUT - CROP PRODUCTION \*\*\*

Sample Information

Acquired by : Admin
Sample Name : peeled,polybag a
Sample ID : peeled,polybag a
Injection Volume : 20 uL
Data Filename : peeled,polybag a.lcd
Method Filename : Gingerols.lcm
Report Filename : Default.lcr
Date Acquired : 10/31/2008 2:25:35 PM
Data Processed : 10/31/2008 5:43:12 PM

Chromatogram

peeled,polybag a C:\LabSolutions\Data\Project\peeled,polybag a.lcd

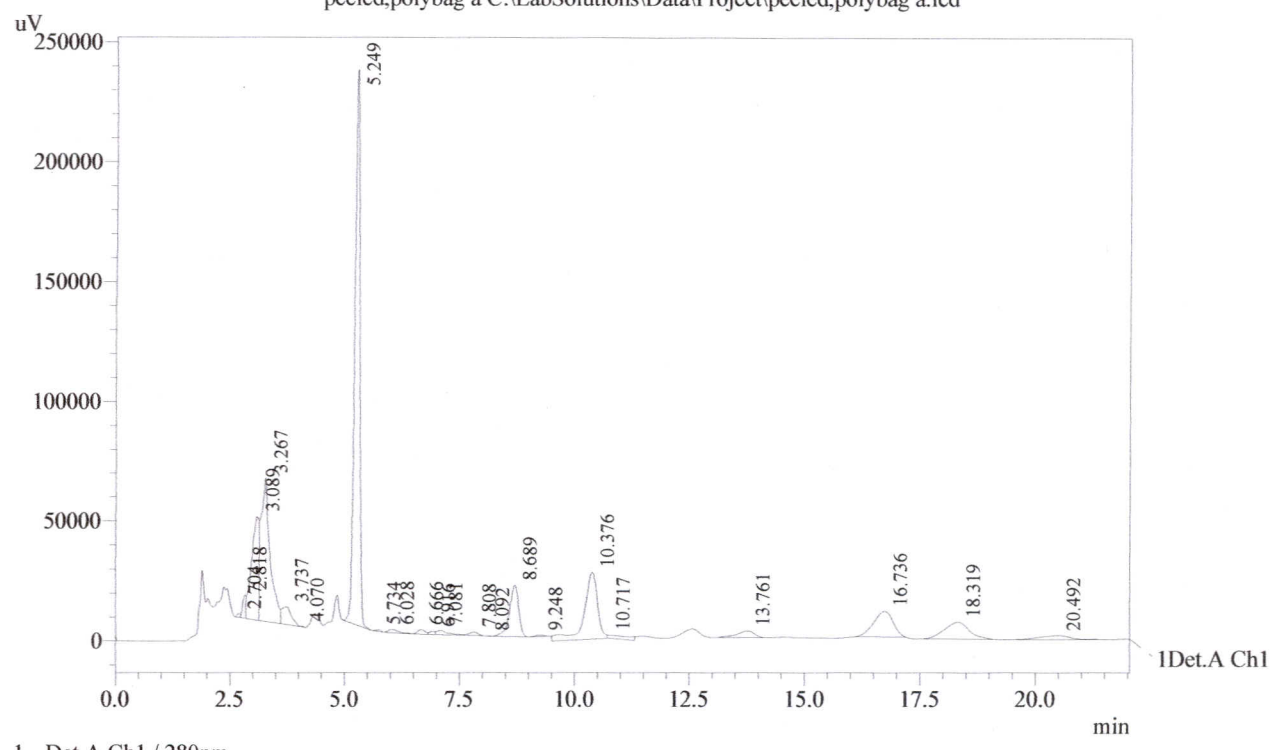

1 Det.A Ch1 / 280nm

PeakTable

Detector A Ch1 280nm

Table with 6 columns: Peak#, Ret. Time, Area, Height, Area %, Height %. It lists 21 peaks with their respective retention times and associated values.

\*\*\* IISR, CALICUT - CROP PRODUCTION \*\*\*

Sample Information

Acquired by : Admin  
Sample Name : ging- peeled, RRL dry 1  
Sample ID : ging- peeled, RRL dry 1  
Injection Volume : 20 uL  
Data Filename : ging- peeled, RRL dry 1.lcd  
Method Filename : Gingerols.lcm  
Report Filename : Default.lcr  
Date Acquired : 8/30/2008 1:34:01 PM  
Data Processed : 9/18/2008 5:57:27 PM

Chromatogram

ging- peeled, RRL dry 1 C:\LabSolutions\Data\Project\ging- peeled, RRL dry 1.lcd

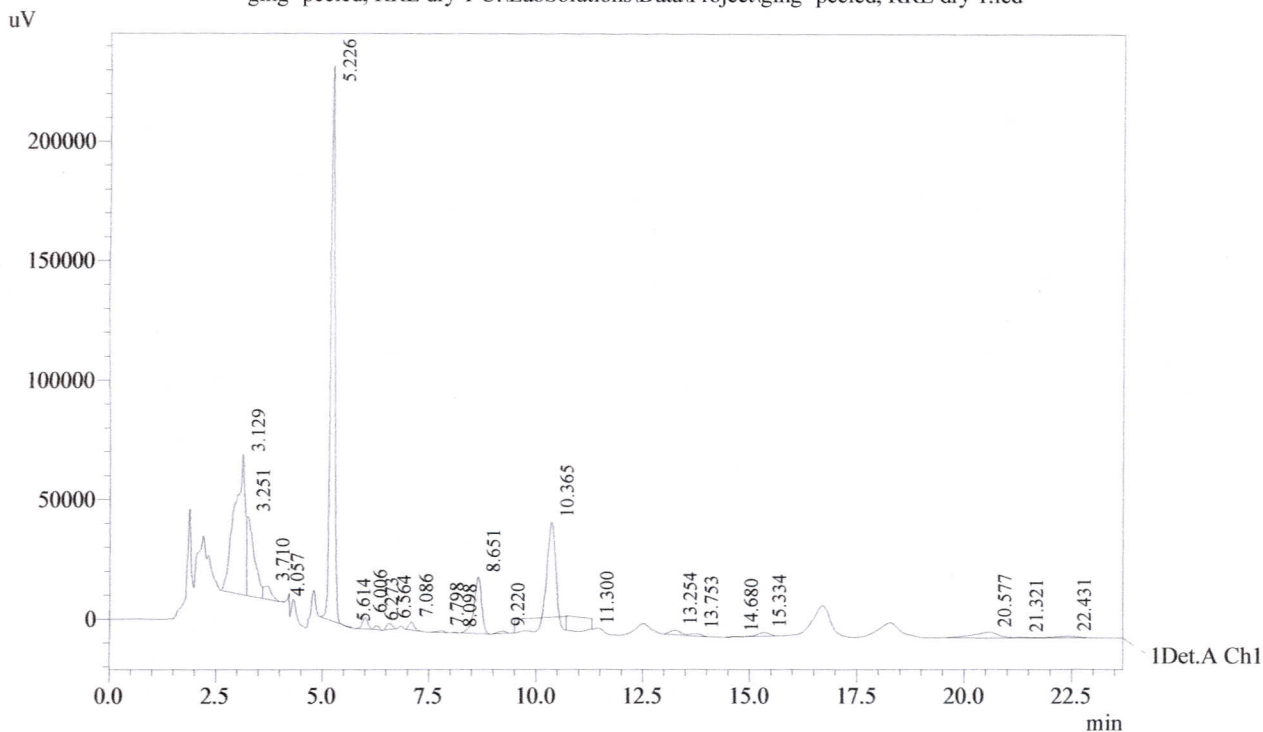

1 Det.A Ch1 / 280nm

PeakTable

Detector A Ch1 280nm

| Peak# | Ret. Time | Area    | Height | Area % | Height % |
|-------|-----------|---------|--------|--------|----------|
| 1     | 3.129     | 1026754 | 58770  | 26.900 | 14.308   |
| 2     | 3.251     | 395486  | 32982  | 10.361 | 8.030    |
| 3     | 3.710     | 71145   | 5499   | 1.864  | 1.339    |
| 4     | 4.057     | 510     | 146    | 0.013  | 0.036    |
| 5     | 5.226     | 1619947 | 232546 | 42.441 | 56.615   |
| 6     | 5.614     | 1138    | 222    | 0.030  | 0.054    |
| 7     | 6.006     | 41414   | 4644   | 1.085  | 1.131    |
| 8     | 6.273     | 12490   | 1718   | 0.327  | 0.418    |
| 9     | 6.564     | 25585   | 2645   | 0.670  | 0.644    |
| 10    | 7.086     | 29985   | 3303   | 0.786  | 0.804    |
| 11    | 7.798     | 8086    | 704    | 0.212  | 0.171    |
| 12    | 8.098     | 1265    | 191    | 0.033  | 0.047    |
| 13    | 8.651     | 293840  | 23544  | 7.698  | 5.732    |
| 14    | 9.220     | 13005   | 1006   | 0.341  | 0.245    |
| 15    | 10.365    | 270873  | 39619  | 7.097  | 9.645    |
| 16    | 11.300    | -204709 | -4596  | -5.363 | -1.119   |
| 17    | 13.254    | 32992   | 1898   | 0.864  | 0.462    |
| 18    | 13.753    | 19034   | 1079   | 0.499  | 0.263    |
| 19    | 14.680    | 1461    | 90     | 0.038  | 0.022    |
| 20    | 15.334    | 29842   | 1487   | 0.782  | 0.362    |
| 21    | 20.577    | 97402   | 2368   | 2.552  | 0.577    |

MILLIGRAMS

0.0  
5.0  
10.0  
15.0  
20.0  
25.0

100.0  
200.0  
300.0  
400.0  
500.0  
600.0  
700.0  
800.0  
900.0

1.568  
1.882  
2.088

2.923

3.922 Linalool

5.023

5.612

6.158

Zingiberene

Geraniol

10.562

11.255

12.082

12.525

13.872

13.488

14.177

14.668

14.982

15.915

16.393

16.917

17.990

18.617

19.280

19.327

19.928

20.517

20.897

21.587

21.884

22.362

22.832

23.442

25.117

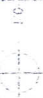

LEISOLD

2071 2882
